# Supplementary material for: Lapatinib-loaded human serum albumin nanoparticles for the prevention and treatment of triple-negative breast cancer metastasis to the brain
Source: PubMed Central journal article supplement (PMC5085136; doi:10.18632/oncotarget.8697), 2016-04-12
Supplement: oncotarget-07-34038-s001.pdf [file oncotarget-07-34038-s001.pdf]

# Lapatinib-loaded human serum albumin nanoparticles for the prevention and treatment of triple-negative breast cancer metastasis to the brain

## Supplementary Materials

### SUPPLEMENTARY 1

On the 12th day post-cell injection, the mouse models were injected with 7.4-MBq of  $^{18}\text{F}$ -FDG via the tail vein, and clearance of nonspecifically bound tracer was allowed for 4 h. After anesthesia with isoflurane, the

mice were then scanned with a small animal-dedicated micro-PET/CT system (Inveon small-animal PET/SPECT/CT system, Siemens Medical Solutions, USA, Inc.). The acquired PET images were merged with the CT images to ensure the actual location of brain metastasis, where the FDG were highly unabsorbed.

### SUPPLEMENTARY 2

**Table 1: The area under the blood or tissue concentration of lapatinib versus time curve ( $\text{AUC}_{0-8\text{h}}$ )**

| Tissues | LHNPs (normal)<br>(iv, 10 mg/kg) <sup>a</sup> | LS (normal)<br>(iv, 10 mg/kg) | LHNPs (model)<br>(iv, 10 mg/kg) | LS (model)<br>(iv, 10 mg/kg) | Tykerb (model)<br>(po, 100 mg/kg) |
|---------|-----------------------------------------------|-------------------------------|---------------------------------|------------------------------|-----------------------------------|
| Heart   | 342.7 ± 23.56                                 | 362.61 ± 9.45                 | 349.40 ± 32.33 <sup>b,c</sup>   | 427.47 ± 39.35               | 1257.93 ± 67.15                   |
| Liver   | 9373.24 ± 161.27 <sup>a</sup>                 | 12330.05 ± 147.80             | 9482.81 ± 179.23 <sup>b,c</sup> | 13870.97 ± 181.32            | 18509.93 ± 141.83                 |
| Spleen  | 4131.23 ± 95.04 <sup>a</sup>                  | 7392.05 ± 88.95               | 4466.11 ± 53.81 <sup>b,c</sup>  | 7647.30 ± 117.43             | 11207.13 ± 56.22                  |
| Lung    | 3290.83 ± 75.35 <sup>a</sup>                  | 5159.73 ± 110.78              | 3413.41 ± 81.53 <sup>b,c</sup>  | 5030.11 ± 100.81             | 11133.77 ± 95.87                  |
| Kidney  | 2195.49 ± 61.71                               | 2188.10 ± 53.97               | 1939.33 ± 57.16 <sup>c</sup>    | 1970.12 ± 45.60              | 4065.58 ± 83.43                   |
| Brain   | 316.18 ± 24.65 <sup>a</sup>                   | 57.46 ± 6.85                  | 1113.04 ± 28.36 <sup>b,c</sup>  | 255.11 ± 18.64               | 204.79 ± 13.30                    |
| Blood   | 7407.73 ± 142.54 <sup>a</sup>                 | 5002.11 ± 115.61              | 7712.01 ± 165.79 <sup>b,c</sup> | 5054.23 ± 170.98             | 10714.35 ± 123.54                 |

<sup>a</sup> $p < 0.05$ , compared with LS (normal). <sup>b</sup> $p < 0.05$ , compared with LS (model). <sup>c</sup> $p < 0.05$ , compared with Tykerb.
